# Supplementary material for: Predicting Surgical Outcome in Drug-Resistant Epilepsy by Combining Interictal Biomarkers within a Machine Learning Framework
Source: Research Square preprint supplement (doi:10.21203/rs.3.rs-8682213/v1), 2026-02-17
Supplement: Supplementary file 1 [file 8ceae4109f091f6d0fdaa151.docx]

**Supplementary Tables**

**Table S1 |** **Good outcome patient demographics and clinical information**

| **#** | **Sex** | **Age**  **[yr.]** | **Seizure**  **Onset [yr.]** | **MRI**  **Findings** | **Epilepsy Side** | **Res. Region** | **iEEG**  **[n]** | **iEEG location** | **Engel (f/u, [yr.])** | | |
| --- | --- | --- | --- | --- | --- | --- | --- | --- | --- | --- | --- |
| ***Boston Children’s Hospital*** | | | | | | | | | |
| 1 | M | 11 | 4 | Normal | R | Fr | 80E | Fr,T | IA(5) | | |
| 2 | M | 19 | 12 | Normal | L+R | Fr,T, P | 140E | Fr, IH | IA(1) | | |
| 3 | F | 7 | 3 | FCD (T,Ins) | L | Fr, T | 90S | Fr,T | IB(8) | | |
| 4 | F | 14 | 10 | Normal | L | T | 72E | Fr, T | IA(5) | | |
| 5 | M | 18 | 9 | Tumor (T) | L | T | 72E+20D | Fr,T | IC(6) | | |
| 6 | F | 16 | 14.5 | FCD (T) | L | T, Hipp | 96E+10D | T | IA(8) | | |
| 7 | M | 2 | 0.3 | TSC (multifocal) | R | Fr | 112E | Fr,P,IH | IA(7) | | |
| 8 | M | 18 | 17 | Para Hipp. gyrus | L | T | 64S | T | IA(2) | | |
| 9 | F | 18 | 15 | Normal | L | T | 88E | Fr, T | IA(7) | | |
| 10 | M | 15 | 12 | HS (anteriorT) | L | T | 80E | T | IA(2) | | |
| 11 | M | 5 | 0.17 | FCD (T) | L | T, O | 96E | P,T,O | IA(1.5) | | |
| 12 | M | 12 | 8 | Encephalomalacia  (P, superior T) | L | P, T | 72E+30D | Fr,P,T | IC(2) | | |
| 13 | M | 13 | 0 | Infarct  (MCA territory) | L | Fr, T | 136E | Fr,P,T,O | IC(3) | | |
| 14 | F | 12 | 1.17 | Normal (Pineal cyst) | L | Fr | 70S | Fr,CG,Ins | IA(4) | | |
| 15 | F | 7 | 4 | FCD (Fr operculum) | R | Fr | 72E+40D | Fr, T | IC (8) | | |
| 16 | M | 15 | 6 | Normal | R | Marginal Sulcus | 102S |  | IA(2) | | |
| 17 | F | 18 | 3 | FCD (Fr) | L | Fr | 72E+40D | Fr,T | IA(2) | | |
| 18 | F | 6 | 3 | Lesion, CTh (P) | L | Fr,P | 80E+20D | P, T,O | IA(1) | | |
| 19 | F | 6 | 4 | PMG (P, T, O) | L+R | P, O(R) | 196S | P,T,O | IA(1) | | |
| 20 | M | 15 | 6 | Normal | L | O,P,T | 236S | P,T,O | IC(4) | | |
| 21 | F | 17 | 12 | FCD (T) | L | T | 138S | T,Fr,C,P,O | IA(2) | | |
| 22 | M | 11 | 8 | FCD (T) | L | T | 164S | T,Fr,C,P,O | IA(2.25) | | |
| 23 | M | 7.7 | 6 | FCD (P, T) | L | T,P,O | 152S | T,P,O | IA(5) | | |
| 24 | M | 11.9 | 10 | Encephalocele (L,T) | L+R | T | 194S | Fr,T | IA(2.5) | | |
| 25 | M | 8.4 | 4 | FCD (L) | L | Fr | 144S | Fr | IA(3.5) | | |
| ***Cook Children’s Hospital*** | | | | | | | | | | |
| 26 | F | 1.4 | 20 | Gliosis or abnormal myelination | R | Ins | 116S | T,F,I,Cing | IA(2) | | |
| 27 | F | 0.41 | 9 | FCD, Gliosis | R | T | 148S | RI, T, O,Cing | IA(2) | | |
| 28 | M | 1 | 15 | FCD | R | P | 106S | T, O, P, Cing, Ins | IA(2) | | |
| 29 | M | 10 | 15 | FCD, Gliosis | L | Fr | 118S | O, F, Cing, Ins,T | IA(2) | | |
| 30 | F | 21 | 1.5 | FCD | R | Fr | 108S | Fr, T | IA(2) | | |
| 31 | M | 8 | 0.33 | TSC, NG | L | P, O | 136S | P, O | IA(2) | | |
| 32 | F | 12 | 4 | FCD (L) | L | Fr | 134S | T, Fr | I(1.17) | | |
| 33 | F | 7 | 2 | TSC | R | Fr | 160S | Fr, P | I(1.5) | | |
| 34 | M | 19 | 17 | Encephalomalacia | L | Fr, Ins | 150S | Fr, T, P | I(1) | | |

Age = Age at surgery; C = Central; CG = Cingulate Gyrus; CM = cortical malformation; CTh = Cortical Thinning; D = Depth Electrodes; E = Electrocorticographic Subdural Electrodes (ECoG); F = Female; f/u = Follow-up; FCD = Focal Cortical Dysplasia; Fr = Frontal; freq. = frequent; Gyr = Gyrus; Hipp = Hippocampus; HS = Hippocampal Sclerosis; iEEG = Intracranial EEG; IH = Intra-Hemispheric; Inf = Inferior; Ins = Insula; L = Left; LG = Low Grade; M = Male; MCA = Middle Cerebral Artery; MTS = Mesial Temporal Sclerosis; min =minute; n = number; NG = Neocortical Gyration; O = Occipital; P = Parietal; PMG = Polymicrogyria; PV = Periventricular; Res. = Resection; R = Right; S = Stereotactic EEG (sEEG); Sul = Sulcus; Sup = Superior; T = Temporal; TSC = Tuberous Sclerosis Complex; Vol. = Volume; yr. = Years.

**Table S2 |** **Poor outcome patient demographics and clinical information**

| # | Sex | **Age**  **[yr.]** | **Seizure**  **Onset [yr.]** | **MRI**  **Findings** | **Epilepsy Side** | **Res. Region** | **iEEG**  **[n]** | **iEEG location** | **Engel (f/u, [yr.])** | | |
| --- | --- | --- | --- | --- | --- | --- | --- | --- | --- | --- | --- |
| ***Boston Children’s Hospital*** | | | | | | | | | |
| 35 | F | 10 | 0.3 | HS (mes. T, PV) | L | T | 140S | P,T,O | IVB(6) | | |
| 36 | F | 9 | 4 | FCD (P) | R | P | 80E+20D | P,O,IH | IIIA(4) | | |
| 37 | M | 6 | 2 | FCD (Fr) | L | Fr | 120E | Fr, P, T | IIIA(11) | | |
| 38 | M | 16 | 4 | Normal (mild gliosis) | L | Fr | 88E | Fr, P, T | IIIA(5) | | |
| 39 | F | 5 | 0.5 | TSC (P,O) | L | O | 128E+40D | P,O,IH | IIIA(2) | | |
| 40 | F | 13 | 7 | Normal | L+R | Fr(R) | 112E+10D | Fr,P,T,IH | III(1) | | |
| 41 | M | 17 | 1.5 | Glioma (PO junction) | R | O, P, T | 128E | P,T, O | IIIA(4) | | |
| 42 | F | 15 | 6 | FCD (mesial P) | L | Fr | 72E | Fr,P,T | IIIA(6) | | |
| 43 | M | 13 | 7 | FCD (T) | L | Fr, T | 112E+10D | Fr,T | IIIA(6) | | |
| 44 | M | 18 | 5 | FCD (sup Fr Gyr) | L | Insula | 212S | Fr,T | IIIA(6) | | |
| 45 | F | 22 | 14 | Trauma | L+R | F, T(R) | 120E | Fr,P,T,O,IH | IIB(5) | | |
| 46 | M | 10 | 7 | PMG (Fr, P) | L | Fr | 64E+60D | Fr, P, T | IIIA(2) | | |
| 47 | M | 4 | 2 | FCD (Fr) | L+R | Fr(R) | 128E+10D | Fr | IIIA(1.5) | | |
| 48 | F | 16 | 3 | Normal | L | Fr | 212S | Fr,P,T | IIIA(2) | | |
| 49 | F | 11 | 0.75 | Normal | R | T | 150S | T,O | III(2) | | |
| 50 | M | 10 | 5 | Normal | L | Fr | 96E+10D | Fr, P | IIIA(1) | | |
| 51 | F | 15 | 3.5 | HS. asymmetry | L | Fr | 166S | Fr, P | IIIA(1) | | |
| 52 | M | 10 | 9.5 | FCD | R | Fr, | 253S | Fr,P,T | III(0.5) | | |
| 53 | M | 10 | 10.5 | Encephalomalacia (P) | L | T | 160S | Fr,C,T,P,O | IIIA(2.5) | | |
| 54 | F | 8 | 8 | Normal | L | P,C | 128S | Fr,C,P | IIC(2.5) | | |
| 55 | F | 8 | 8 | Normal | L | P,C | 128S | Fr,C,P | IIC(2.5) | | |
| 56 | F | 12 | 4 | MTS | L | Fr | 188S | Fr, T | III(5) | | |
| 57 | M | 14 | 0.5 | CM (Ins.) | L | Fr | 164S | Fr | IIIA(1) | | |
| 58 | F | 6 | 4 | FCD | R | P | 144S | Fr, P, T | IIIA(3) | | |
| 59 | M | 12 | 9 | FCD | R | P, T | 216S | Fr, P, T | II(3.5) | | |
| 60 | F | 5.7 | 2.75 | FCD | L | Fr, P | 76S | Fr, P | II(1) | | |
| ***Cook Children’s Hospital*** | | | | | | | | | | |
| 61 | M | 19 | 0 | FCD | L | T | 110S | H, P, Gyrus T, Ins | IIIA(2) | | |
| 62 | F | 17 | 0.9 | Normal | R | T | 100S | T | IVB(2) | | |

Age = Age at surgery; C = Central; CG = Cingulate Gyrus; CM = cortical malformation; D = Depth Electrodes; E = Electrocorticographic Subdural Electrodes (ECoG); F = Female; f/u = Follow-up; FCD = Focal Cortical Dysplasia; Fr = Frontal; freq. = frequent; Gyr = Gyrus; Hipp = Hippocampus; HS = Hippocampal Sclerosis; iEEG = Intracranial EEG; IH = Intra-Hemispheric; Inf = Inferior; Ins = Insula; L = Left; LG = Low Grade; M = Male; MCA = Middle Cerebral Artery; MTS. = Mesial Temporal Sclerosis; min =minute; n = number; NG = Neocortical Gyration; O = Occipital; P = Parietal; PMG = Polymicrogyria; PV = Periventricular; Res. = Resection; R = Right; S = Stereotactic EEG (sEEG); Sul = Sulcus; Sup = Superior; T = Temporal; TSC = Tuberous Sclerosis Complex; Vol. = Volume; yr. = Years.

**Supplementary Notes**

1. **Optimizing the Number of Trees in the Random Forest Classifier**


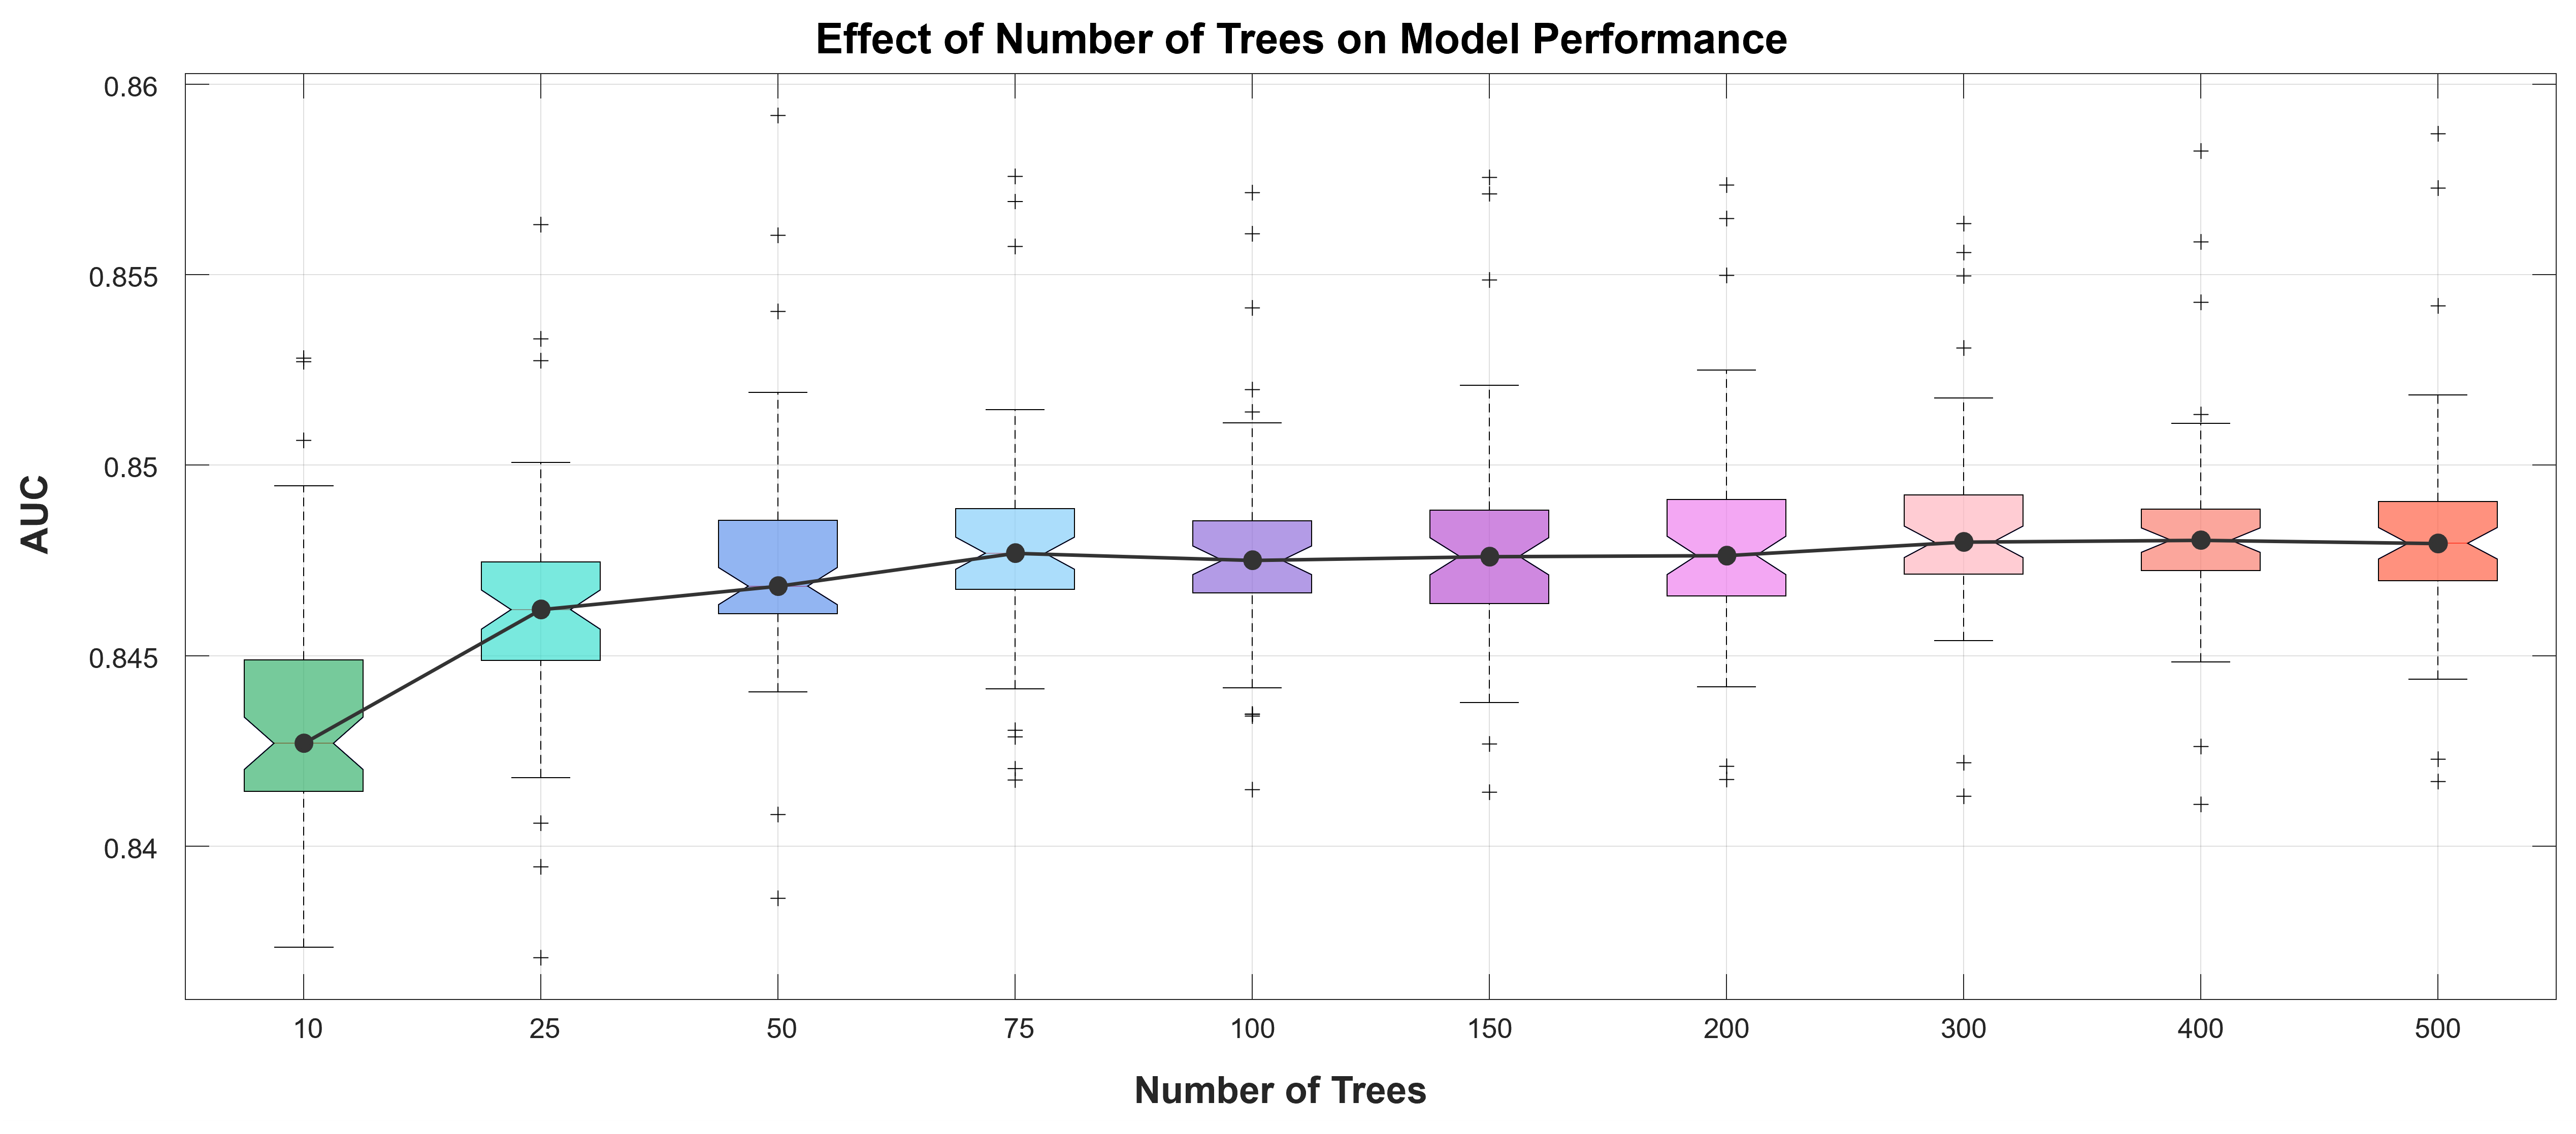


**Fig. S1. Optimization of the number of trees in the Random Forest classifier.** The number of trees in the Random Forest classifier was varied from 10 to 500, and the classifier using combined features (CF) was trained for each value. The area under the receiver operating characteristic curve (AUC-ROC) was computed for each tree configuration to assess performance stability. The notches indicate the median metric value across all patients, while the lower and upper box edges represent the 25th and 75th percentiles. Whiskers extend to the minimum and maximum values after excluding outliers, and black “+” symbols denote outliers.

1. **Performance metrics of different implantation type on EZ predictability**

Dice score quantifies the spatial similarity and overlap between identified spatial regions. A Dice score above 0.8 indicates almost perfect agreement.1,2


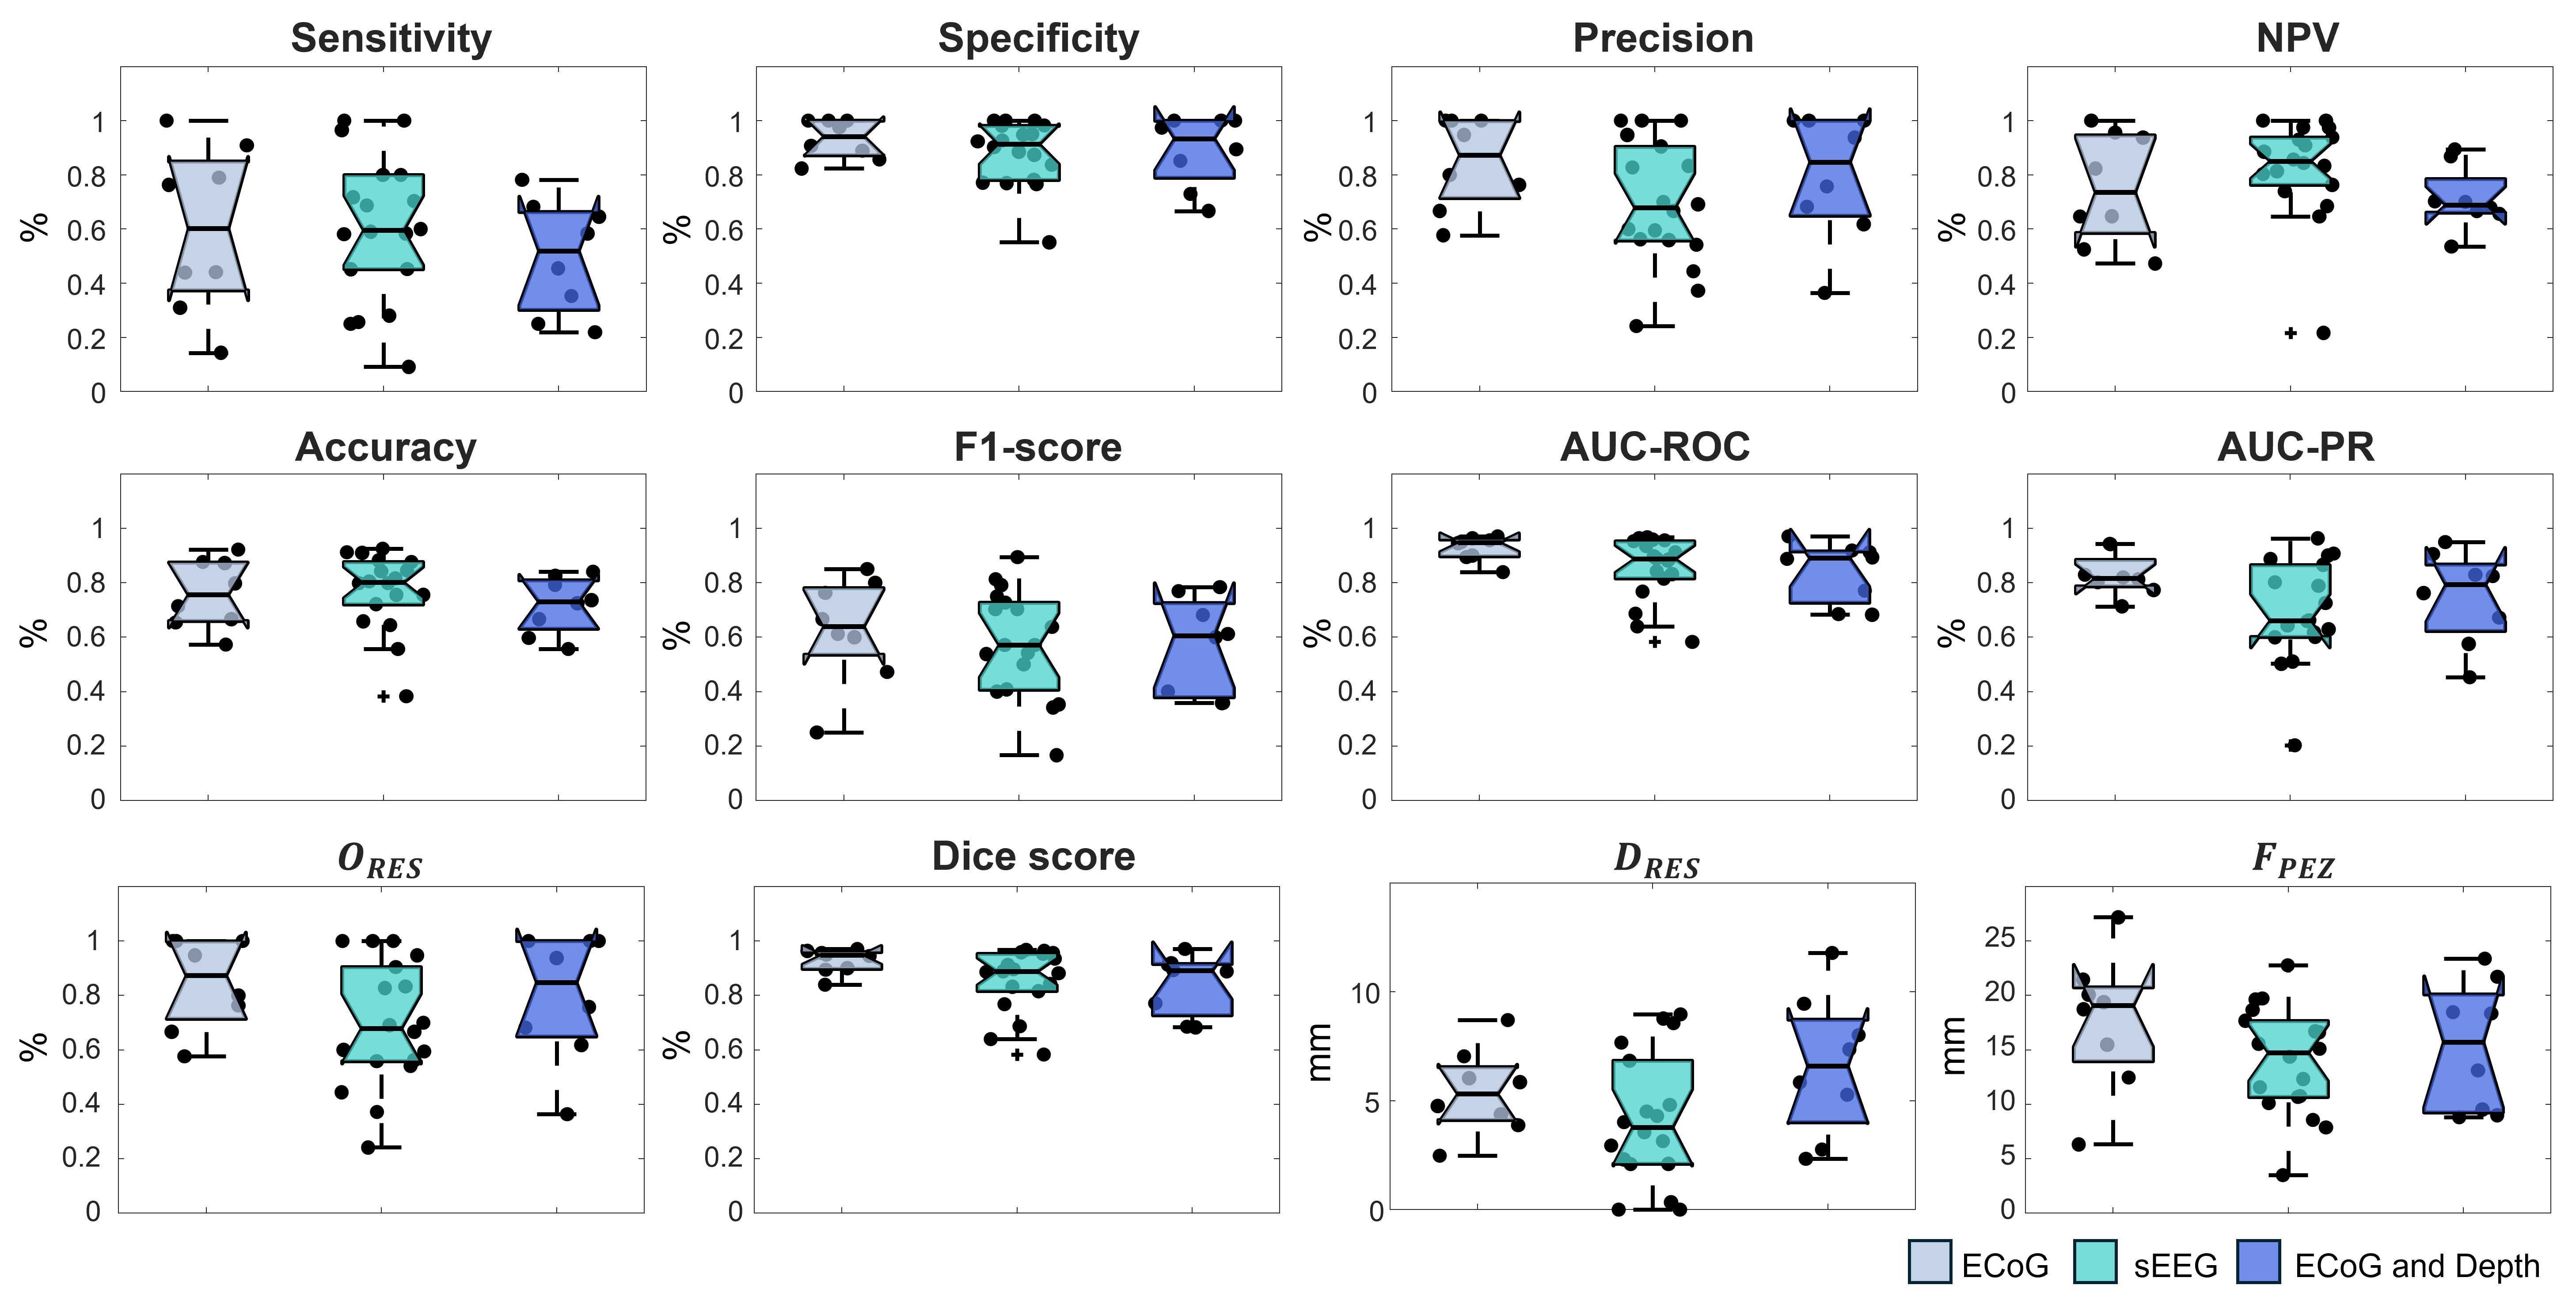


**Fig. S2. Epileptogenic zone (EZ) prediction using combined features (CF) for good outcome patients with different implantation types.** Performance metrics were evaluated for good outcome patients using the combined features (CF) for subsets of patients with ECoG, sEEG, or both ECoG and depth electrodes. Metrics included sensitivity, specificity, precision, negative predictive value (NPV), accuracy, F1 score, area under the receiver operating characteristic curve (AUC-ROC), and area under the precision–recall curve (AUC-PR). Spatial measures of the predicted EZ (PEZ) were also assessed, including Focality ( , mm), Dice score with resection, overlap with resection ( , %), and distance from resection (, mm) are also shown. Classification performance was assessed using a leave-one-patient-out cross-validation approach trained and tested on good outcome patients. The notches represent the median metric value across all patients, while the lower and upper box edges correspond to the 25th and 75th percentiles. Whiskers extend to the minimum and maximum values after excluding outliers. Significant differences are indicated by asterisks: **P* < 0.05 (*Wilcoxon rank-sum* test).

**Supplementary References**

1. Dice, L. R. Measures of the amount of ecologic association between species. *Ecol. 26* 297–302 (1945).

2. Pajula, J., Kauppi, J.-P. & Tohka, J. Inter-Subject Correlation in fMRI: Method Validation against Stimulus-Model Based Analysis. *PLOS ONE* **7**, 1–13 (2012).
